# Supplementary material for: Effect of Selenium Priming duration on Germination and Early Seedling Development of Arachis hypogaea L. Across a Salinity Gradient
Source: Research Square preprint supplement (doi:10.21203/rs.3.rs-8605366/v1), 2026-02-10
Supplement: Supplementary file 1 [file 3663a5bbdf4c592d3ca5beea.docx]

| Treatment | MGT | CVG | GRI | GV |
| --- | --- | --- | --- | --- |
| ST0 | 2.90 ± 0.17ᵃ | 34.67 ± 1.15ᵃ | 0.47 ± 0.06ᵃ | 23.00 ± 3.24ᵃ |
| ST1.5 | 3.40 ± 0.20ᵃ | 29.67 ± 1.53ᵃ | 0.44 ± 0.06ᵃ | 19.61 ± 2.78ᵃ |
| ST3.5 | 3.50 ± 0.71ᵃ | 29.67 ± 6.66ᵃ | 0.31 ± 0.17ᵇ | 13.33 ± 7.12ᵇ |
| ST5 | 4.00 ± 0.00ᵃ | 25.00 ± 0.00ᵃ | 0.27 ± 0.19ᵇ | 10.00 ± 7.07ᵇ |
| ST7 | 3.00 ± 0.00ᵃ | 33.33 ± 0.00ᵃ | 0.13 ± 0.09ᶜ | 4.44 ± 3.14ᶜ |

Table S1: Effect of selenium on Germination Indices Parameter for unprimed seeds (selenium =0 mg/L)

Key: MGT =Mean Germination Time; CVG=Coefficient of Variation of Germination; GRI=Germination Rate Index; Germination Velocity; ST= Salt concentration (g/L). Means are represented in ± SD. Letters of different alphabet at each column are significantly different at ≤ 0.05

Table S2: Effect of selenium on Germination Indices Parameter for selenium primed seeds (selenium =1.5mg/L)

| Treatment | MGT | CVG | GRI | GV |
| --- | --- | --- | --- | --- |
| ST0 – 3h | 3.11 ± 0.16ᵃ | 32.22 ± 1.57ᵃ | 0.60 ± 0.12ᵃ | 25.71 ± 5.14ᵃ |
| ST0 – 6h | 2.86 ± 0.81ᵃ | 37.43 ± 8.82ᵃ | 0.66 ± 0.09ᵃ | 30.29 ± 8.66ᵃ |
| ST0 – 9h | 2.39 ± 0.28ᵇ | 42.50 ± 5.40ᵃ | 0.47 ± 0.10ᵇ | 22.33 ± 4.71ᵇ |
| ST1.5 – 3h | 3.50 ± 1.22ᵃ | 32.86 ± 12.62ᵃ | 0.37 ± 0.14ᶜ | 17.14 ± 8.16ᶜ |
| ST1.5 – 6h | 3.13 ± 0.66ᵃ | 33.33 ± 6.80ᵃ | 0.54 ± 0.25ᵇ | 23.40 ± 8.16ᵇ |
| ST1.5 – 9h | 3.06 ± 0.75ᵃ | 35.28 ± 10.42ᵃ | 0.35 ± 0.05ᶜ | 15.27 ± 2.36ᶜ |
| ST3.5 – 3h | NaN* | NaN* | 0.16 ± 0.13ᵈ | NaN* |
| ST3.5 – 6h | 5.67 ± 2.05ᵃ | 20.83 ± 9.00ᵇ | 0.16 ± 0.11ᵈ | 7.06 ± 4.97ᵈ |
| ST3.5 – 9h | 5.50 ± 0.41ᵃ | 18.28 ± 1.36ᵇ | 0.17 ± 0.06ᵈ | 7.27 ± 2.36ᵈ |
| ST5 – 3h | 5.06 ± 0.48ᵃ | 19.96 ± 1.87ᵇ | 0.21 ± 0.03ᵈ | 9.23 ± 1.36ᵈ |
| ST5 – 6h | 4.44 ± 1.81ᵃ | 28.60 ± 15.23ᵃ | 0.24 ± 0.12ᵈ | 9.00 ± 3.67ᵈ |
| ST5 – 9h | 5.17 ± 0.62ᵃ | 19.63 ± 2.28ᵇ | 0.21 ± 0.06ᵈ | 9.03 ± 2.36ᵈ |
| ST7 – 3h | 6.22 ± 0.31ᵃ | 16.11 ± 0.79ᵇ | 0.15 ± 0.02ᵈ | 7.50 ± 1.36ᵈ |
| ST7 – 6h | 5.28 ± 0.77ᵃ | 19.34 ± 2.67ᵇ | 0.19 ± 0.01ᵈ | 8.84 ± 1.36ᵈ |
| ST7 – 9h | 3.50 ± 1.22ᵃ | 32.86 ± 12.62ᵃ | 0.21 ± 0.05ᵈ | 9.52 ± 2.83ᵈ |
|  |  |  |  |  |

Key: MGT =Mean Germination Time; CVG=Coefficient of Variation of Germination; GRI=Germination Rate Index; Germination Velocity; ST= Salt concentration (g/L). h= selenium priming duration in hours. Means are represented in ± SD. Letters of different alphabet at each column are significantly different at ≤ 0.05 for 3-9 hours priming for each salt level.

* NaN: Not a number indicates that the value could not be calculated due to insufficient germination to compute time-dependent indices

Table S3: Effect of selenium on Germination Indices Parameter for selenium primed seeds (selenium =2.5mg/L)

| Treatment | MGT | CVG | GRI | GV |
| --- | --- | --- | --- | --- |
| ST0 – 3h | 2.70 ± 0.22ᵃ | 37.26 ± 2.85ᵃ | 0.49 ± 0.24ᵃ | 22.22 ± 10.10ᵃ |
| ST0 – 6h | 2.47 ± 0.34ᵃ | 41.29 ± 6.18ᵃ | 0.50 ± 0.10ᵃ | 24.27 ± 4.71ᵃ |
| ST0 – 9h | 2.33 ± 0.47ᵃ | 44.44 ± 7.86ᵃ | 0.41 ± 0.16ᵃ | 20.00 ± 8.16ᵃ |
| ST1.5 – 3h | 2.92 ± 0.82ᵃ | 37.12 ± 10.22ᵃ | 0.36 ± 0.20ᵃ | 16.00 ± 8.49ᵃ |
| ST1.5 – 6h | 3.38 ± 0.49ᵃ | 30.24 ± 4.38ᵃ | 0.58 ± 0.19ᵃ | 23.68 ± 7.84ᵃ |
| ST1.5 – 9h | 4.44 ± 0.82ᵃ | 23.28 ± 4.24ᵃ | 0.33 ± 0.16ᵃ | 13.50 ± 6.66ᵃ |
| ST3.5 – 3h | 3.50 ± 0.71ᵃ | 30.00 ± 7.07ᵃ | 0.38 ± 0.07ᵃ | 17.14 ± 4.71ᵃ |
| ST3.5 – 6h | 1.56 ± 0.57ᵇ | 72.62 ± 23.39ᵃ | 0.76 ± 0.37ᵃ | 42.86 ± 26.35ᵃ |
| ST3.5 – 9h | 3.00 ± 0.82ᵃ | 36.11 ± 10.39ᵃ | 0.32 ± 0.05ᵃ | 13.33 ± 0.00ᵃ |
| ST5 – 3h | 3.78 ± 0.31ᵃ | 26.67 ± 2.36ᵃ | 0.37 ± 0.03ᵃ | 15.88 ± 0.00ᵃ |
| ST5 – 6h | 3.44 ± 1.81ᵃ | 36.51 ± 14.33ᵃ | 0.33 ± 0.19ᵃ | 11.61 ± 4.71ᵃ |
| ST5 – 9h | 3.33 ± 0.47ᵃ | 30.56 ± 3.93ᵃ | 0.27 ± 0.12ᵃ | 12.00 ± 4.90ᵃ |
| ST7 – 3h | NaN* | NaN* | 0.13 ± 0.10ᵃ | NaN* |
| ST7 – 6h | 3.83 ± 0.85ᵃ | 27.30 ± 5.52ᵃ | 0.34 ± 0.18ᵃ | 13.91 ± 4.71ᵃ |
| ST7 – 9h | NaN* | NaN* | 0.07 ± 0.05ᵃ | NaN* |

Key: MGT =Mean Germination Time; CVG=Coefficient of Variation of Germination; GRI=Germination Rate Index; Germination Velocity; ST= Salt concentration (g/L). h= selenium priming duration in hours Means are represented in ± SD. Letters of different alphabet at each column are significantly different at ≤ 0.05 for 3-9 hours priming for each salt level.

* NaN: Not a number indicates that the value could not be calculated due to insufficient germination to compute time-dependent indices

Table S4: Effect of selenium on Germination Indices Parameter for selenium primed seeds (selenium =5 mg/L)

| Treatment | MGT | CVG | GRI | GV |
| --- | --- | --- | --- | --- |
| ST0 – 3h | 2.70 ± 0.22ᵃ | 37.26 ± 2.85ᵃ | 0.49 ± 0.24ᵃ | 22.22 ± 10.10ᵃ |
| ST0 – 6h | 2.47 ± 0.34ᵃ | 41.29 ± 6.18ᵃ | 0.50 ± 0.10ᵃ | 24.27 ± 4.71ᵃ |
| ST0 – 9h | 2.33 ± 0.47ᵃ | 44.44 ± 7.86ᵃ | 0.41 ± 0.16ᵃ | 20.00 ± 8.16ᵃ |
| ST1.5 – 3h | 2.92 ± 0.82ᵃ | 37.12 ± 10.22ᵃ | 0.36 ± 0.20ᵃ | 16.00 ± 8.49ᵃ |
| ST1.5 – 6h | 3.38 ± 0.49ᵃ | 30.24 ± 4.38ᵃ | 0.58 ± 0.19ᵃ | 23.68 ± 7.84ᵃ |
| ST1.5 – 9h | 4.44 ± 0.82ᵃ | 23.28 ± 4.24ᵃ | 0.33 ± 0.16ᵃ | 13.50 ± 6.66ᵃ |
| ST3.5 – 3h | 3.50 ± 0.71ᵃ | 30.00 ± 7.07ᵃ | 0.38 ± 0.07ᵃ | 17.14 ± 4.71ᵃ |
| ST3.5 – 6h | 1.56 ± 0.57ᵇ | 72.62 ± 23.39ᵃ | 0.76 ± 0.37ᵃ | 42.86 ± 26.35ᵃ |
| ST3.5 – 9h | 3.00 ± 0.82ᵃ | 36.11 ± 10.39ᵃ | 0.32 ± 0.05ᵃ | 13.33 ± 0.00ᵃ |
| ST5 – 3h | 3.78 ± 0.31ᵃ | 26.67 ± 2.36ᵃ | 0.37 ± 0.03ᵃ | 15.88 ± 0.00ᵃ |
| ST5 – 6h | 3.44 ± 1.81ᵃ | 36.51 ± 14.33ᵃ | 0.33 ± 0.19ᵃ | 11.61 ± 4.71ᵃ |
| ST5 – 9h | 3.33 ± 0.47ᵃ | 30.56 ± 3.93ᵃ | 0.27 ± 0.12ᵃ | 12.00 ± 4.90ᵃ |
| ST7 – 3h | NaN* | NaN* | 0.13 ± 0.10ᵃ | NaN* |
| ST7 – 6h | 3.83 ± 0.85ᵃ | 27.30 ± 5.52ᵃ | 0.34 ± 0.18ᵃ | 13.91 ± 4.71ᵃ |

Key: MGT =Mean Germination Time; CVG=Coefficient of Variation of Germination; GRI=Germination Rate Index; Germination Velocity; ST= Salt concentration (g/L). h= selenium priming duration in hours Means are represented in ± SD. Letters of different alphabet at each column are significantly different at ≤ 0.05 for 3-9 hours priming for each salt level.

* NaN: Not a number indicates that the value could not be calculated due to insufficient germination to compute time-dependent indices.

Table S5: Effect of selenium on Germination Indices Parameter for selenium primed seeds (selenium =10 mg/L)

| Treatment | MGT | CVG | GRI | GV |
| --- | --- | --- | --- | --- |
| ST0 – 3h | 2.83 ± 0.31ᵃ | 35.33 ± 3.98ᵃ | 0.58 ± 0.07ᵃ | 25.71 ± 3.54ᵃ |
| ST0 – 6h | 2.72 ± 0.25ᵃ | 36.76 ± 3.23ᵃ | 0.55 ± 0.06ᵃ | 24.44 ± 2.83ᵃ |
| ST0 – 9h | 2.61 ± 0.33ᵃ | 38.33 ± 4.71ᵇ | 0.49 ± 0.05ᵇ | 22.22 ± 2.36ᵇ |
| ST1.5 – 3h | 3.17 ± 0.44ᵃ | 31.55 ± 4.52ᵃ | 0.39 ± 0.06ᶜ | 17.78 ± 2.83ᶜ |
| ST1.5 – 6h | 3.06 ± 0.41ᵃ | 32.68 ± 4.25ᵃ | 0.42 ± 0.05ᶜ | 18.89 ± 2.36ᶜ |
| ST1.5 – 9h | 3.22 ± 0.38ᵃ | 31.05 ± 3.69ᵃ | 0.36 ± 0.04ᶜ | 16.67 ± 2.36ᶜ |
| ST3.5 – 3h | 4.61 ± 0.53ᵃ | 21.71 ± 2.49ᵇ | 0.23 ± 0.05ᵈ | 10.00 ± 2.36ᵈ |
| ST3.5 – 6h | 4.94 ± 0.62ᵃ | 20.24 ± 2.53ᵇ | 0.21 ± 0.04ᵈ | 9.23 ± 1.83ᵈ |
| ST3.5 – 9h | 5.17 ± 0.58ᵃ | 19.34 ± 2.23ᵇ | 0.20 ± 0.03ᵈ | 8.89 ± 1.57ᵈ |
| ST5 – 3h | 5.06 ± 0.62ᵃ | 19.76 ± 2.44ᵇ | 0.22 ± 0.04ᵈ | 9.72 ± 1.83ᵈ |
| ST5 – 6h | 4.83 ± 0.71ᵃ | 22.01 ± 3.12ᵇ | 0.24 ± 0.05ᵈ | 10.71 ± 2.36ᵈ |
| ST5 – 9h | 5.28 ± 0.66ᵃ | 18.94 ± 2.36ᵇ | 0.21 ± 0.04ᵈ | 9.52 ± 2.36ᵈ |
| ST7 – 3h | 6.11 ± 0.48ᵃ | 16.36 ± 1.28ᶜ | 0.16 ± 0.02ᵉ | 7.22 ± 1.36ᵉ |
| ST7 – 6h | 5.94 ± 0.53ᵃ | 16.84 ± 1.50ᶜ | 0.17 ± 0.02ᵉ | 7.50 ± 1.36ᵉ |
| ST7 – 9h | 5.72 ± 0.62ᵃ | 17.48 ± 1.94ᶜ | 0.18 ± 0.03ᵉ | 7.86 ± 1.57ᵉ |

Key: MGT =Mean Germination Time; CVG=Coefficient of Variation of Germination; GRI=Germination Rate Index; Germination Velocity; ST= Salt concentration (g/L). h= selenium priming duration in hours Means are represented in ± SD. Letters of different alphabet at each column are significantly different at ≤ 0.05 for 3-9 hours priming for each salt level.

* NaN: Not a number indicates that the value could not be calculated due to insufficient germination to compute time-dependent indices.

**Title**:

Effect of Selenium Priming duration on Germination and Early Seedling Development of *Arachis hypogaea L.* Across a Salinity Gradient.

**Running Title**:

Selenium Priming Improves Germination and Early Seedling Growth in peanut across salinity gradient.

**Authors**:

Eromosele Noble Isibor¹*, Rida Batool², Boniface Edegbai³, Ifie Etumah Sandra4 Beckley Ikhajiagbe5

**Corresponding author**: Eromosele Noble Isibor.

Email: nobly1311@gmail.com

ORCID: 0009-0007-7323-5424
